# Supplementary material for: Non-invasive wearable devices for urinary incontinence detection—a mini review
Source: Frontiers journal article supplement (doi:10.3389/fsens.2023.1279158), 2023-11-09
Supplement: Image_1.pdf [file Image_1.pdf]

## *Supplementary Material*

### 1. Supplementary Figure

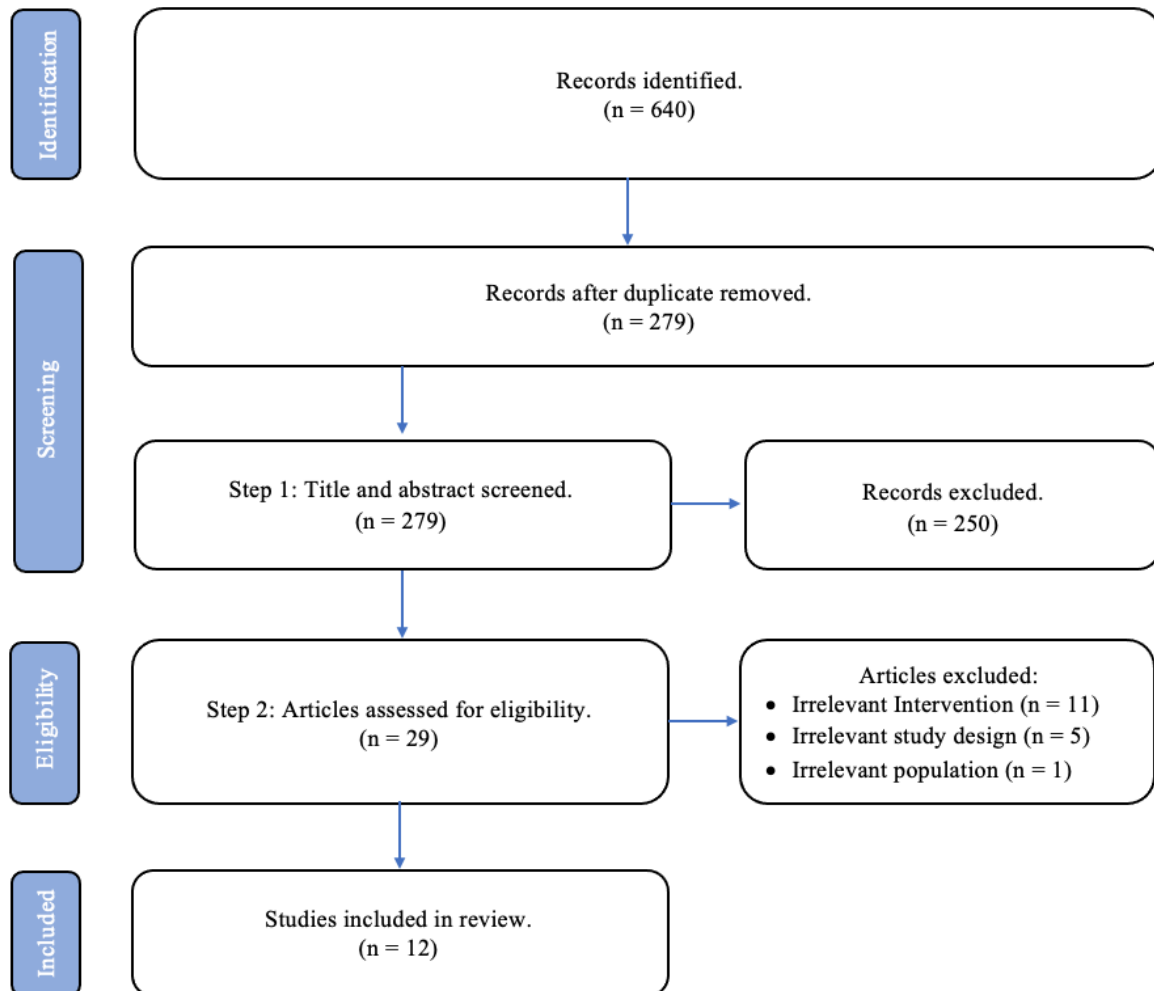

**Supplementary Figure 1.** Flowchart of articles identification and selection process
